# Supplementary figures and images for: Gain-of-function variants in the ion channel gene TRPM3 underlie a spectrum of neurodevelopmental disorders
Source: eLife journal article supplement (doi:10.7554/elife.81032), 2023-01-16

**FIGURE 1 – FIGURE SUPPLEMENT 2**


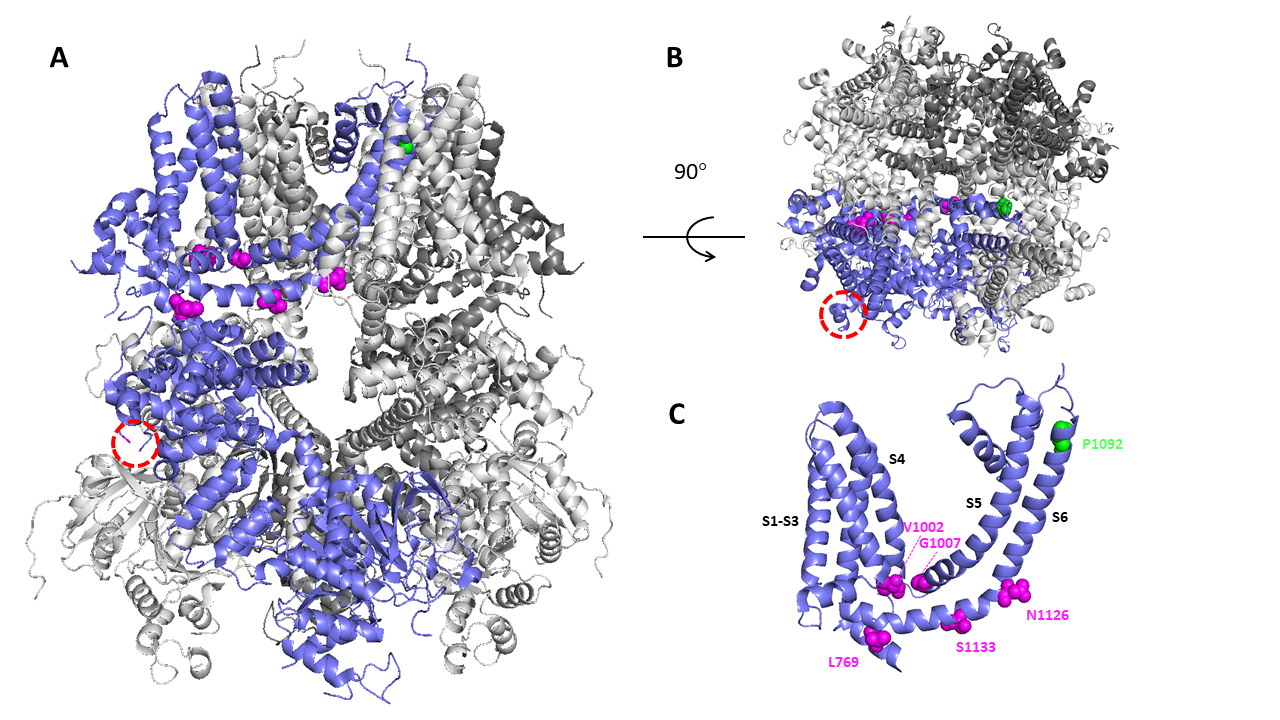

Supplement: supp [file elife-81032-supp-v1.zip]

**FIGURE 1 – FIGURE SUPPLEMENT 1**

**
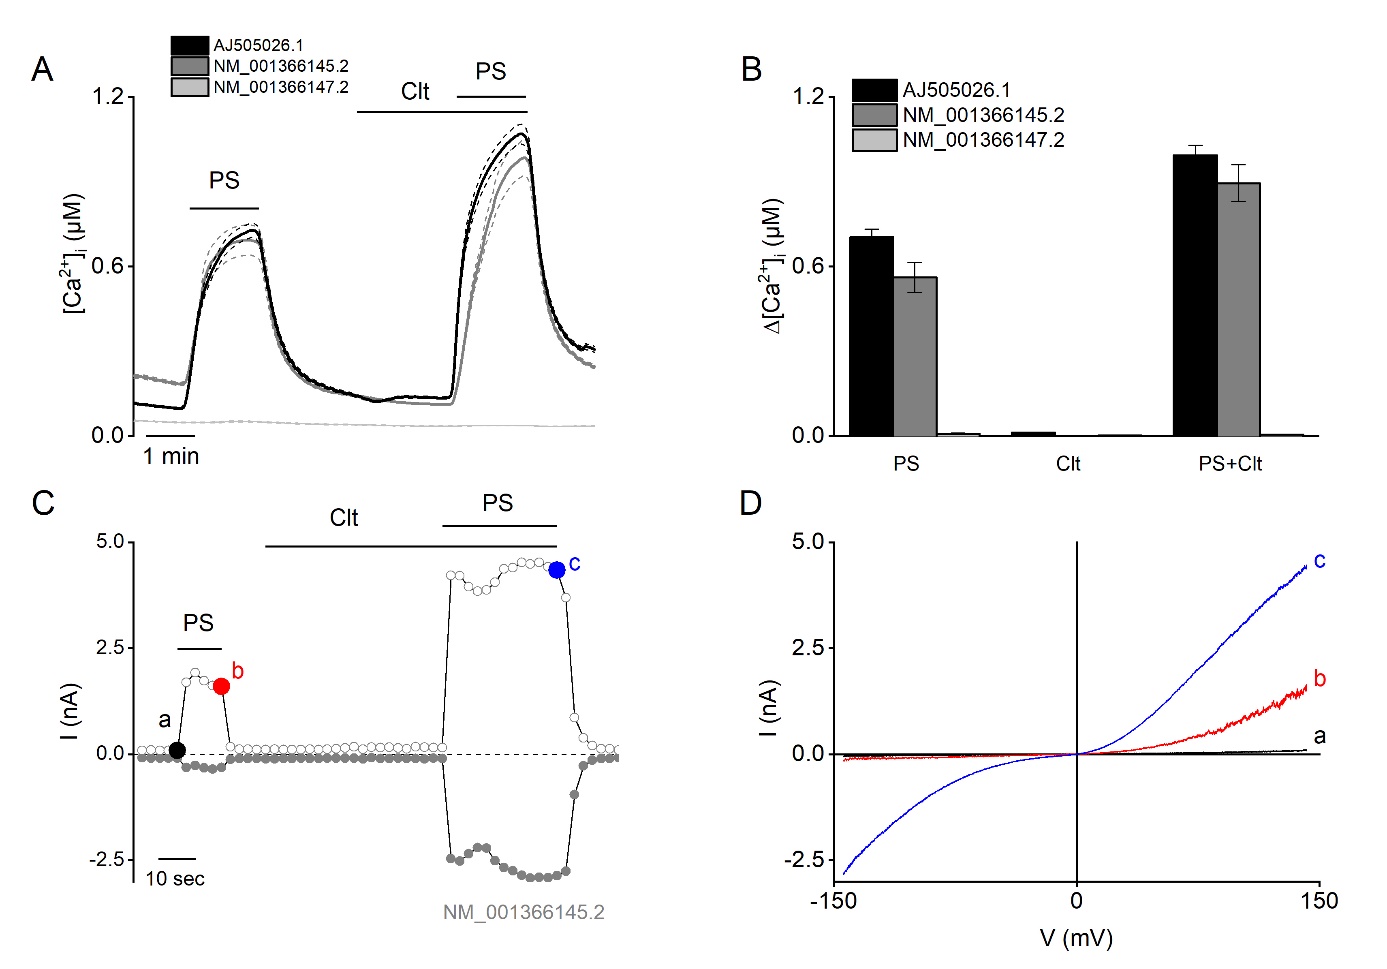
**

Supplement: supp [file elife_poa_e81032_Figure_1_figure_supplement_1.docx]

**FIGURE 1- FIGURE SUPPLEMENT 3**


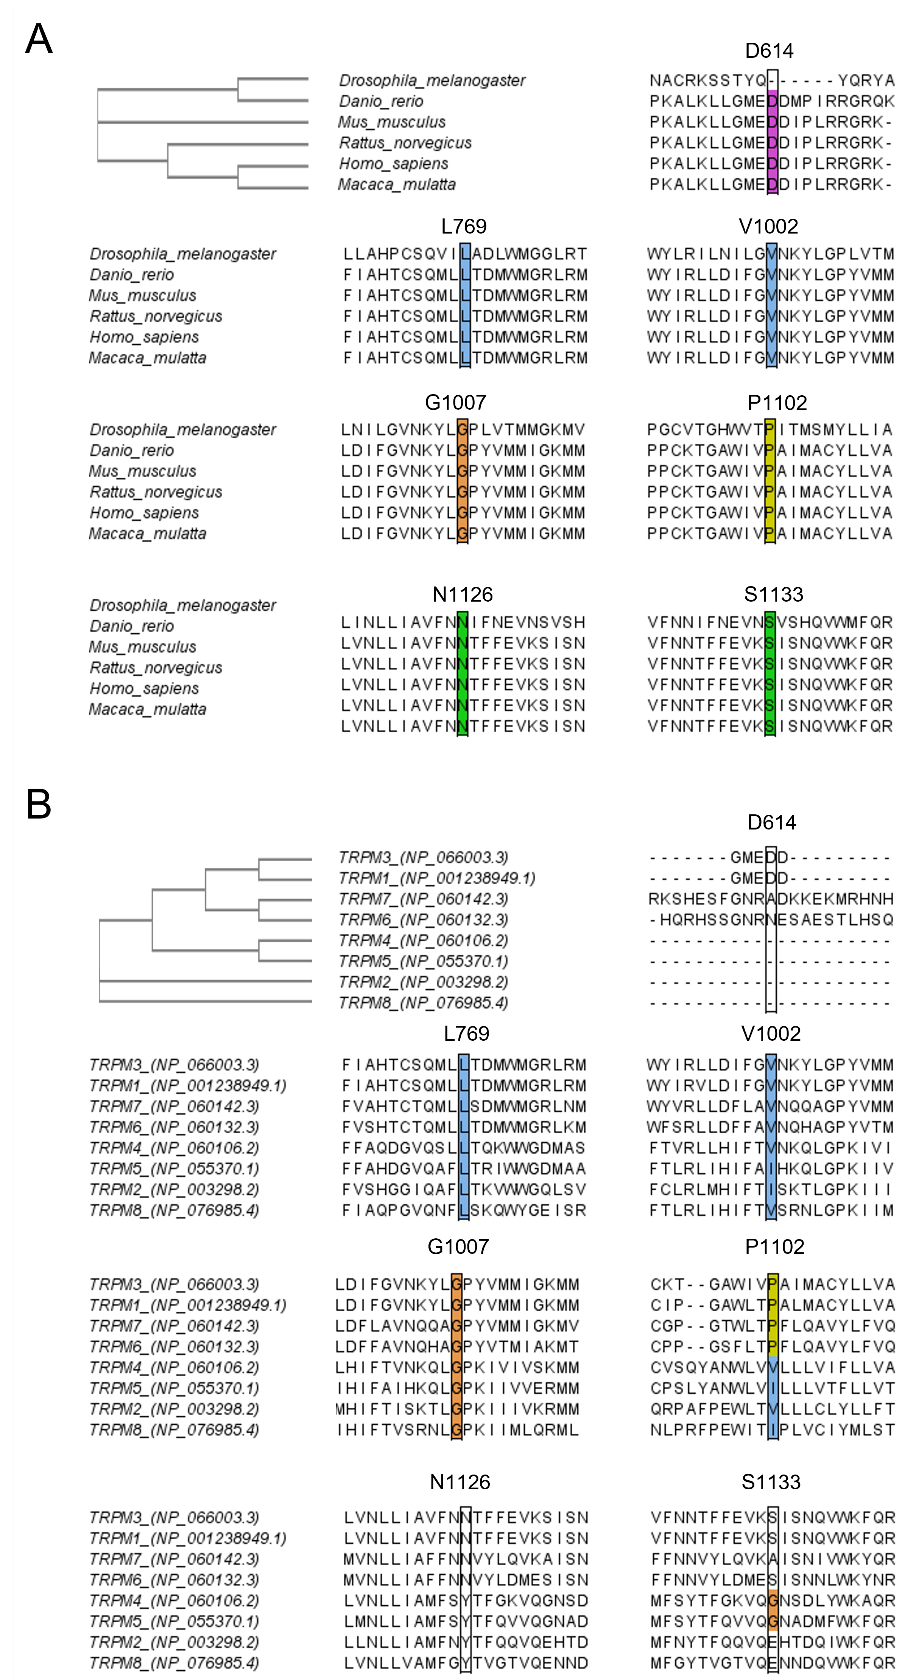

Supplement: supp [file elife_poa_e81032_Figure_1_figure_supplement_3.docx]

**FIGURE 3 – FIGURE SUPPLEMENT 1**


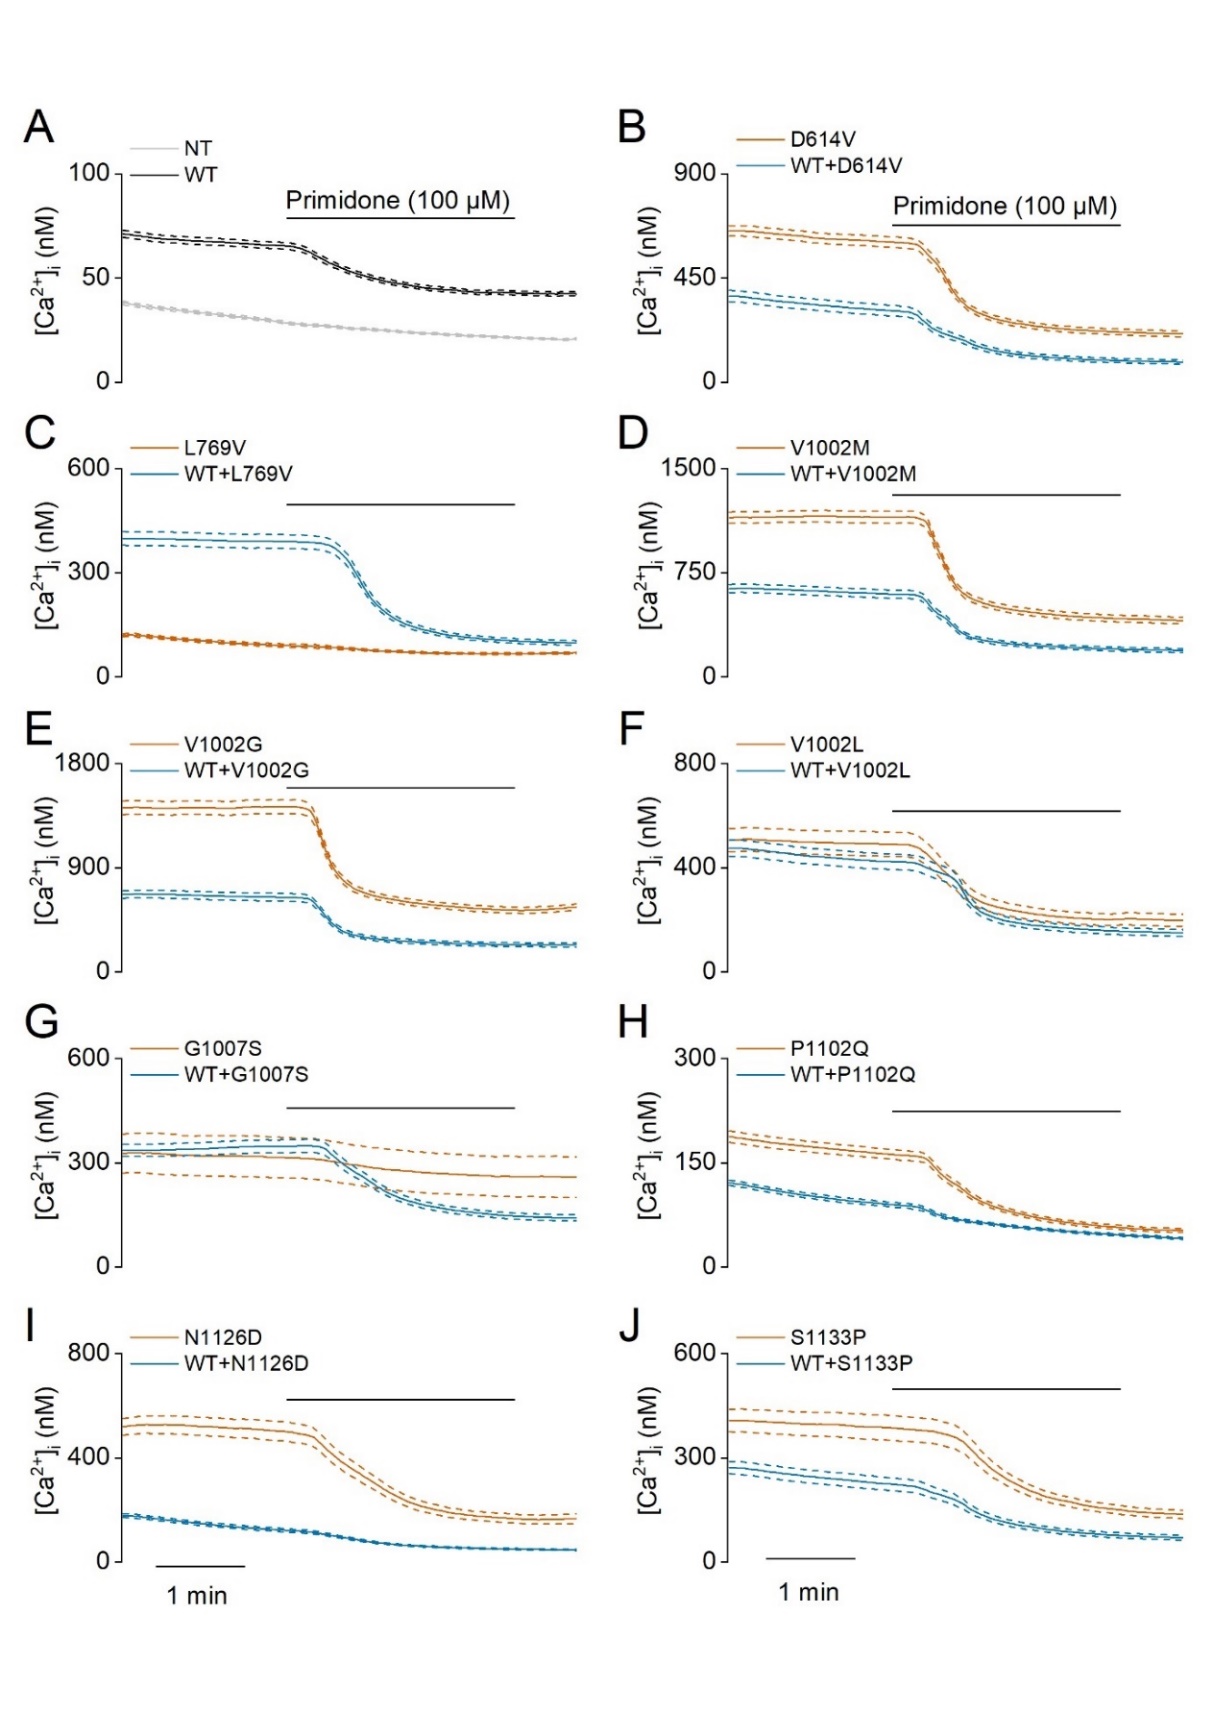

Supplement: supp [file elife_poa_e81032_Figure_3_figure_supplement_1.docx]

**FIGURE 3 – FIGURE SUPPLEMENT 2**


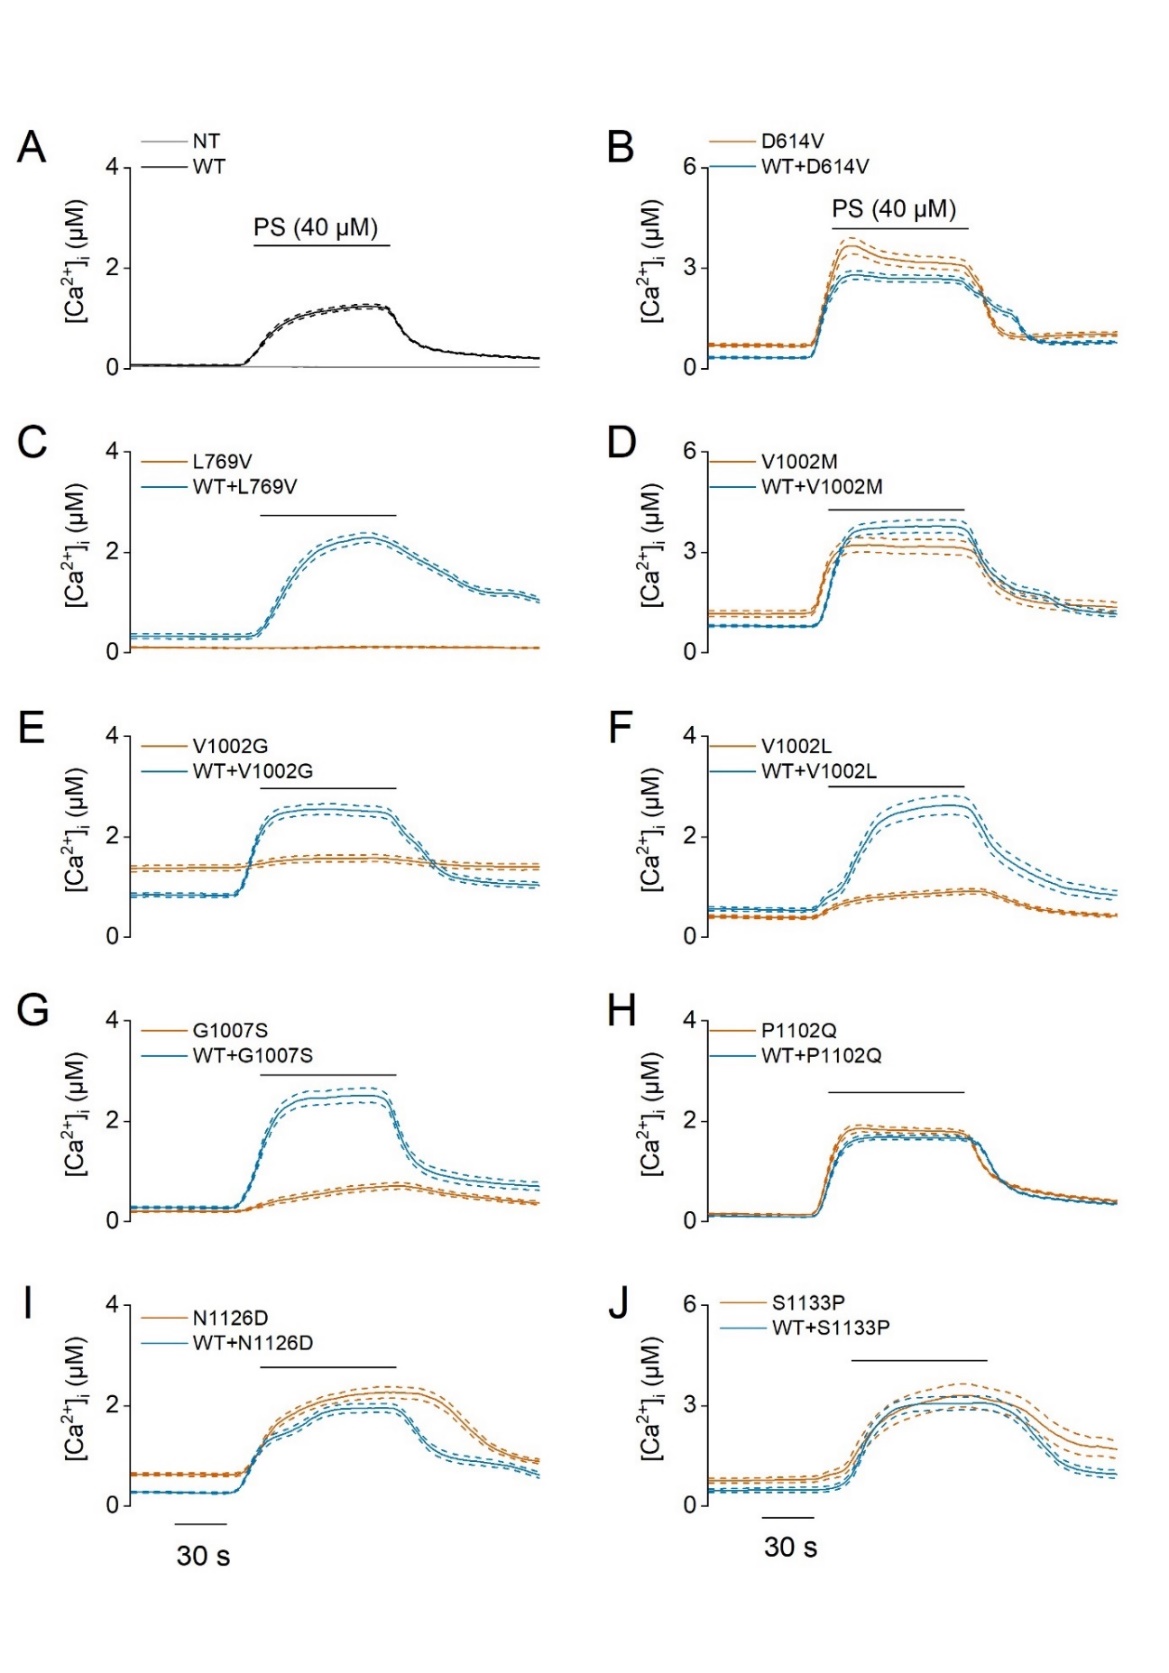

Supplement: supp [file elife_poa_e81032_Figure_3_figure_supplement_2.docx]

**FIGURE 3 – FIGURE SUPPLEMENT 3**


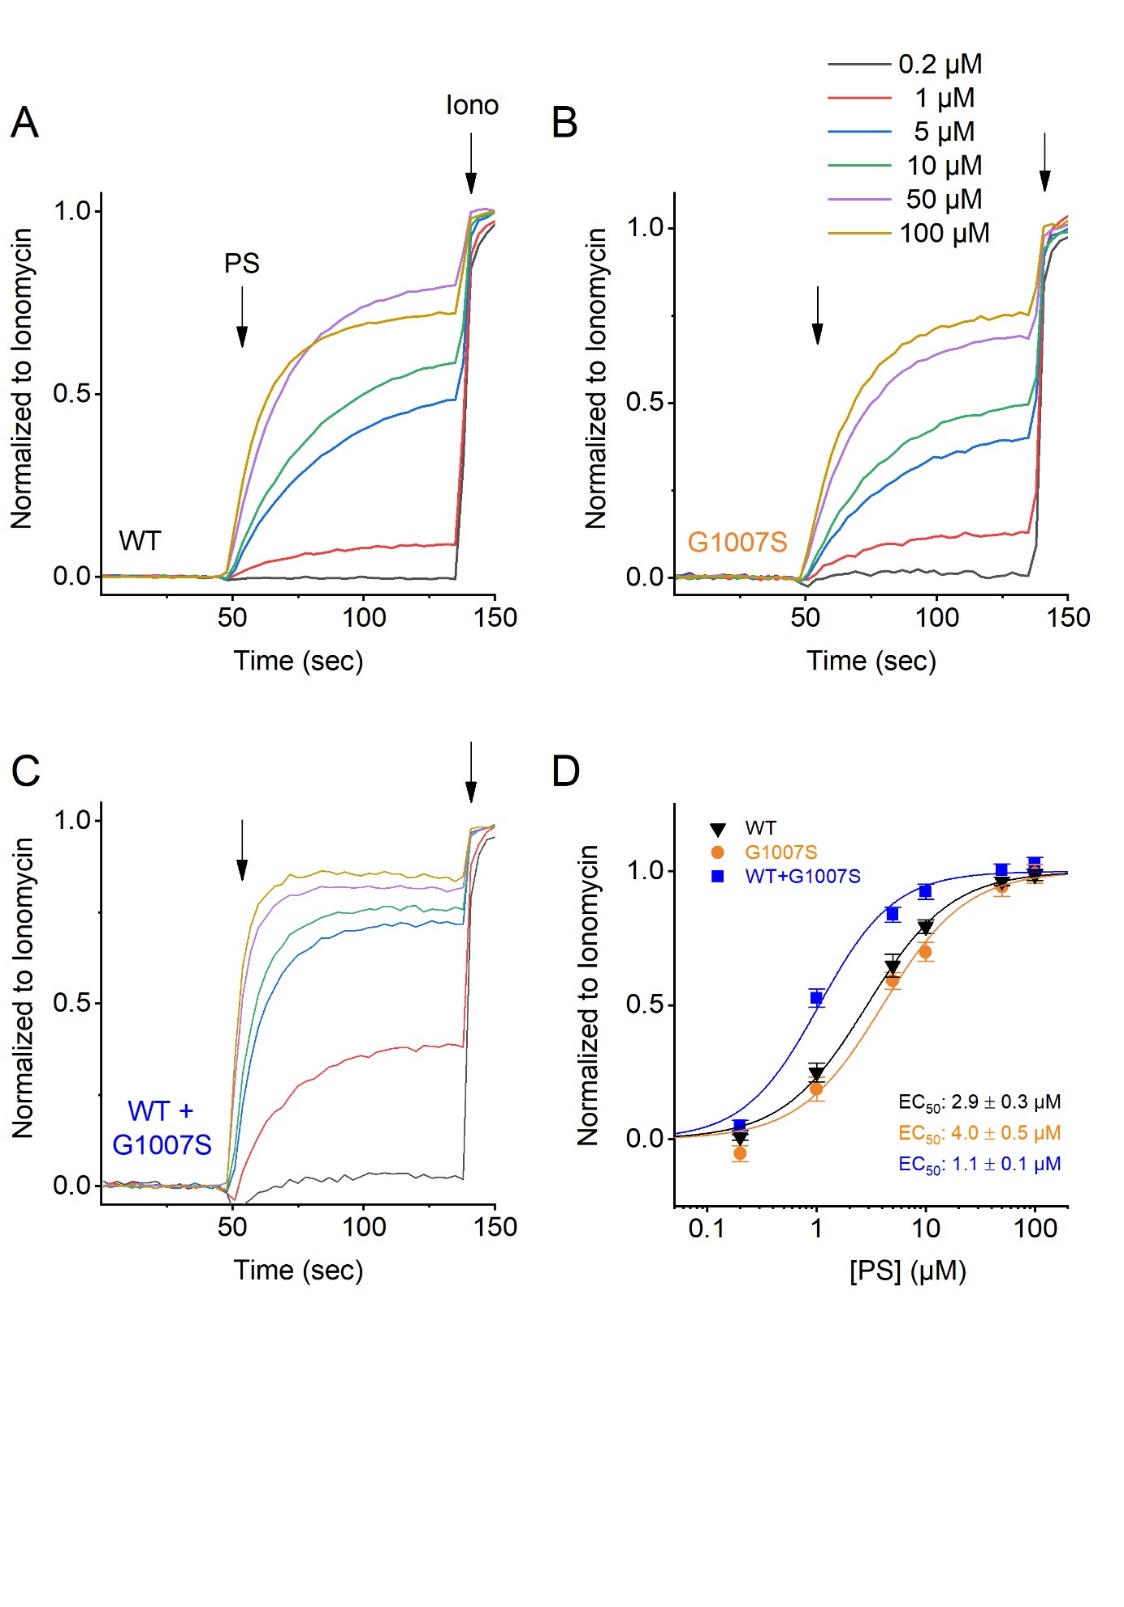

Supplement: supp [file elife_poa_e81032_Figure_3_figure_supplement_3.docx]

**FIGURE 3 – FIGURE SUPPLEMENT 4**

**
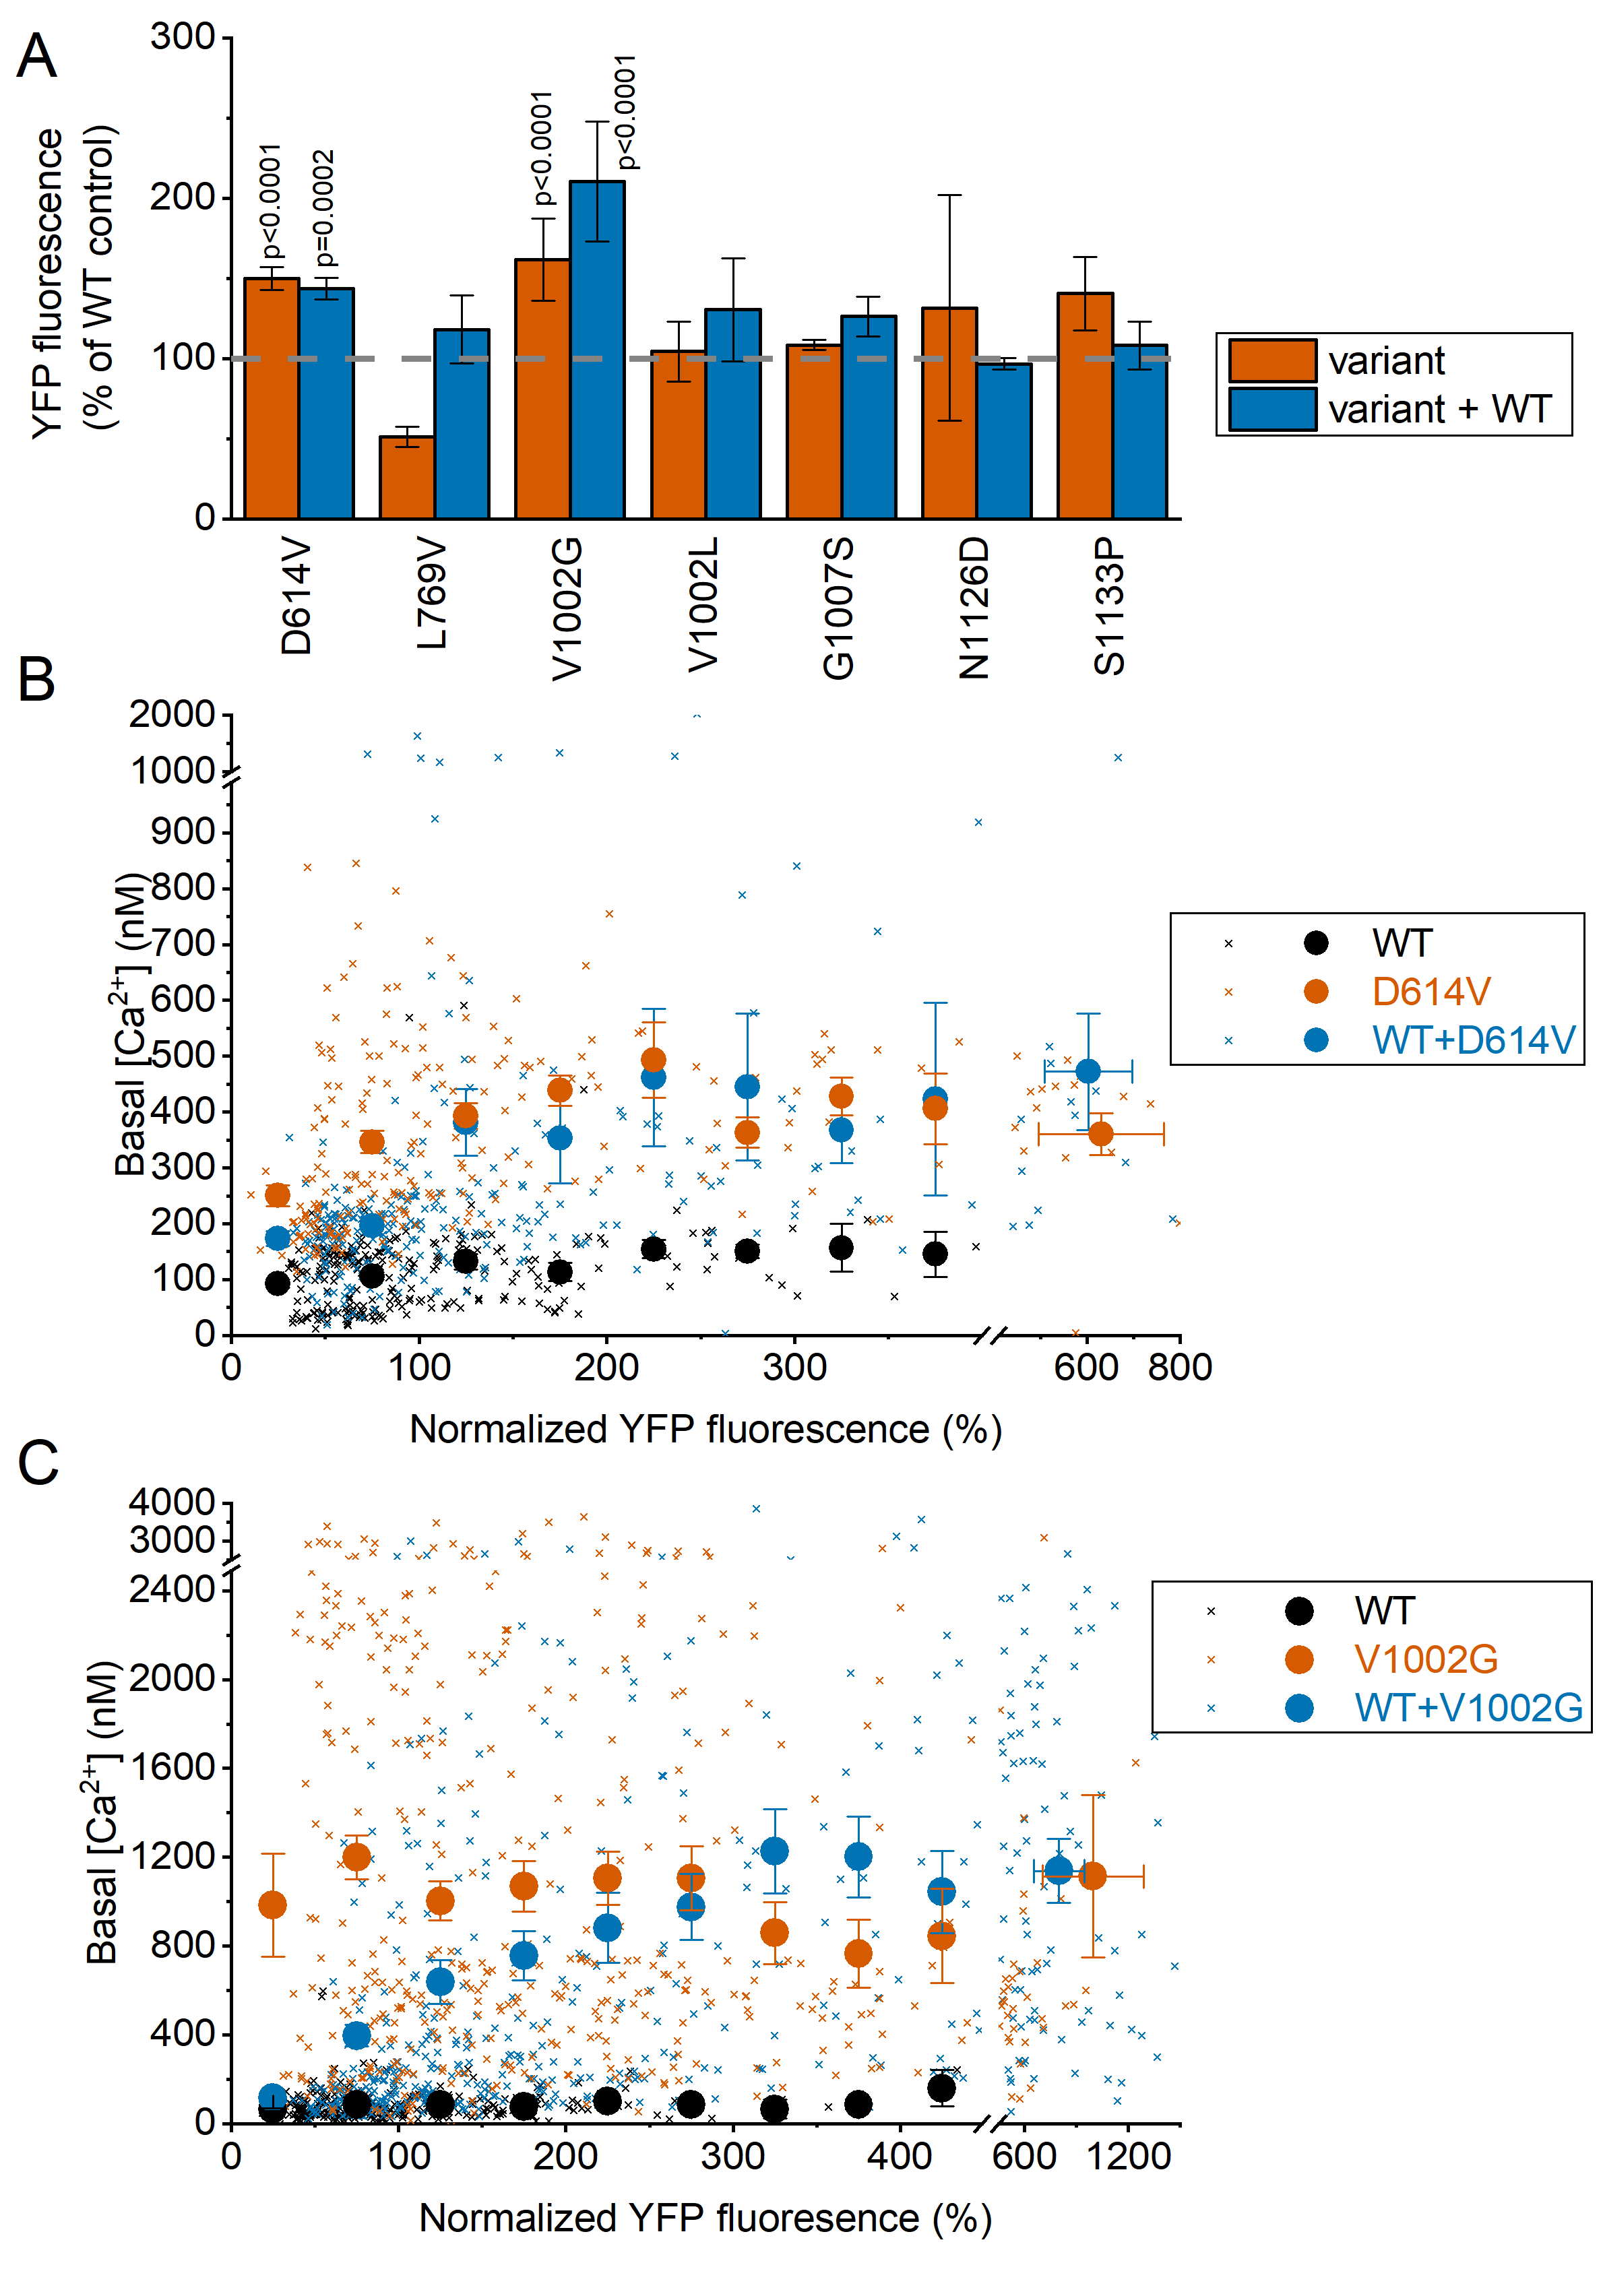
**

Supplement: supp [file elife_poa_e81032_Figure_3_figure_supplement_4.docx]

**FIGURE 4 – FIGURE SUPPLEMENT 1**


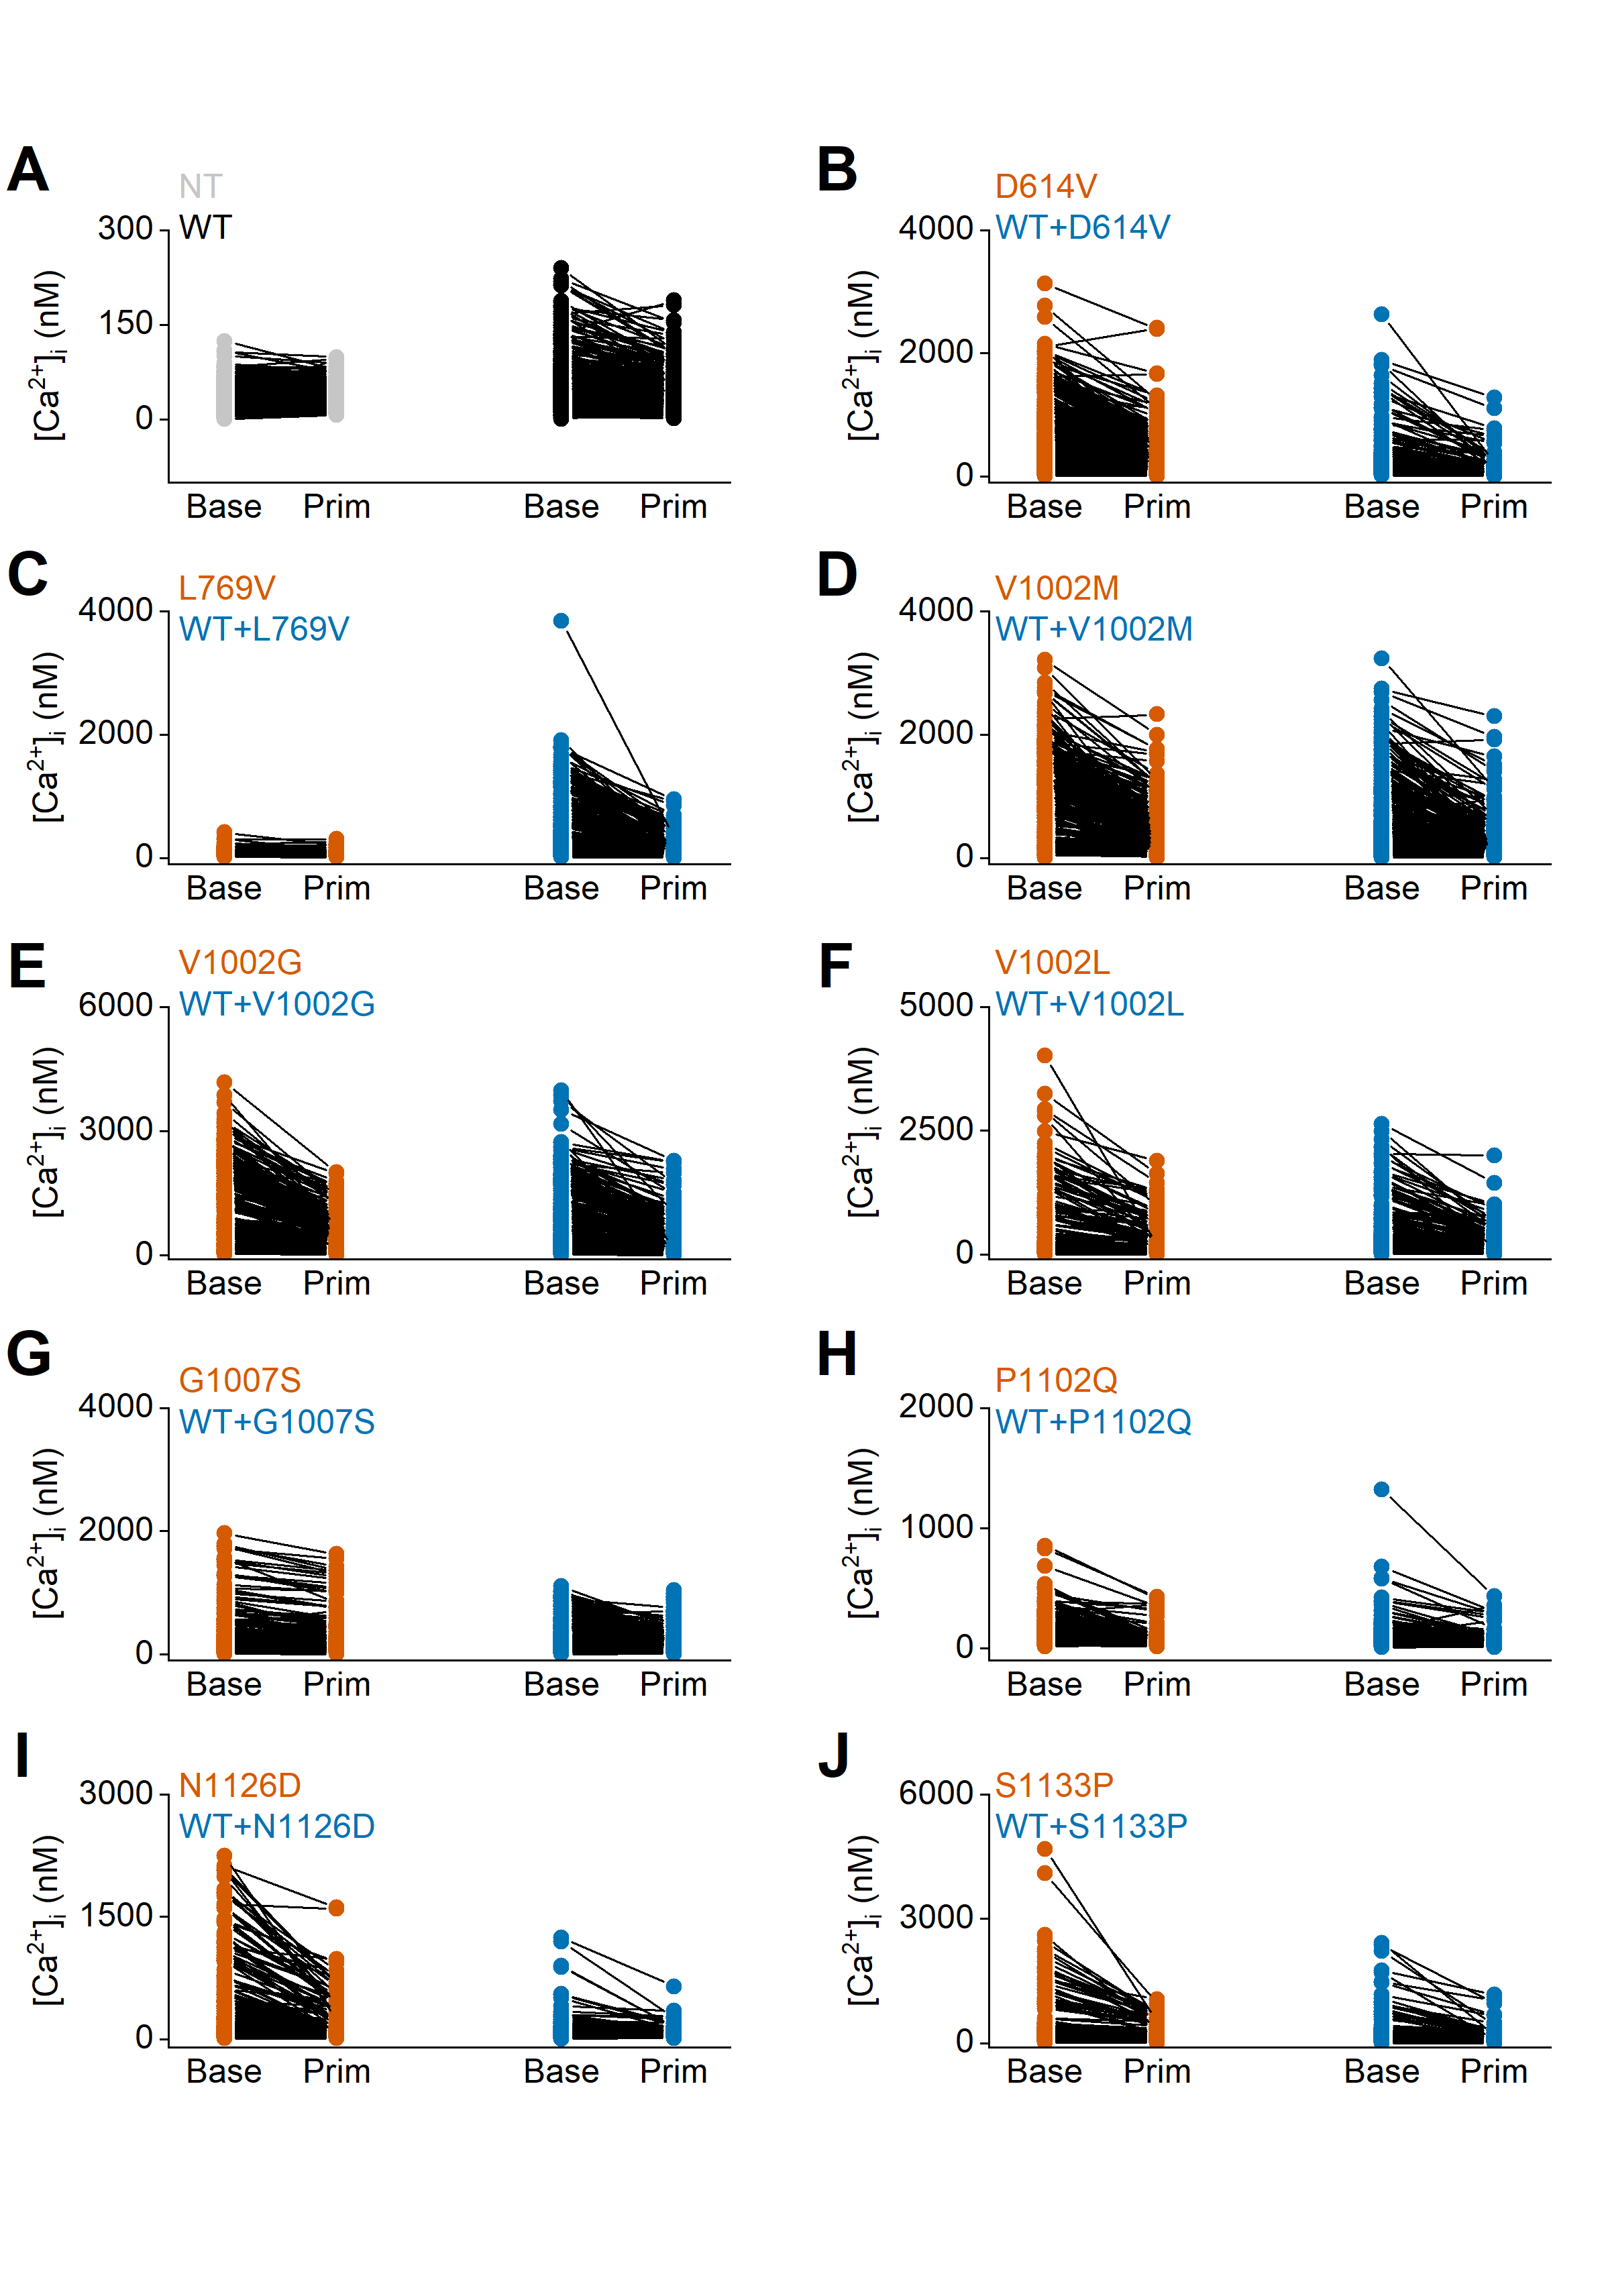

Supplement: supp [file elife_poa_e81032_Figure_4_figure_supplement_1.docx]

**FIGURE 4 – FIGURE SUPPLEMENT 2**


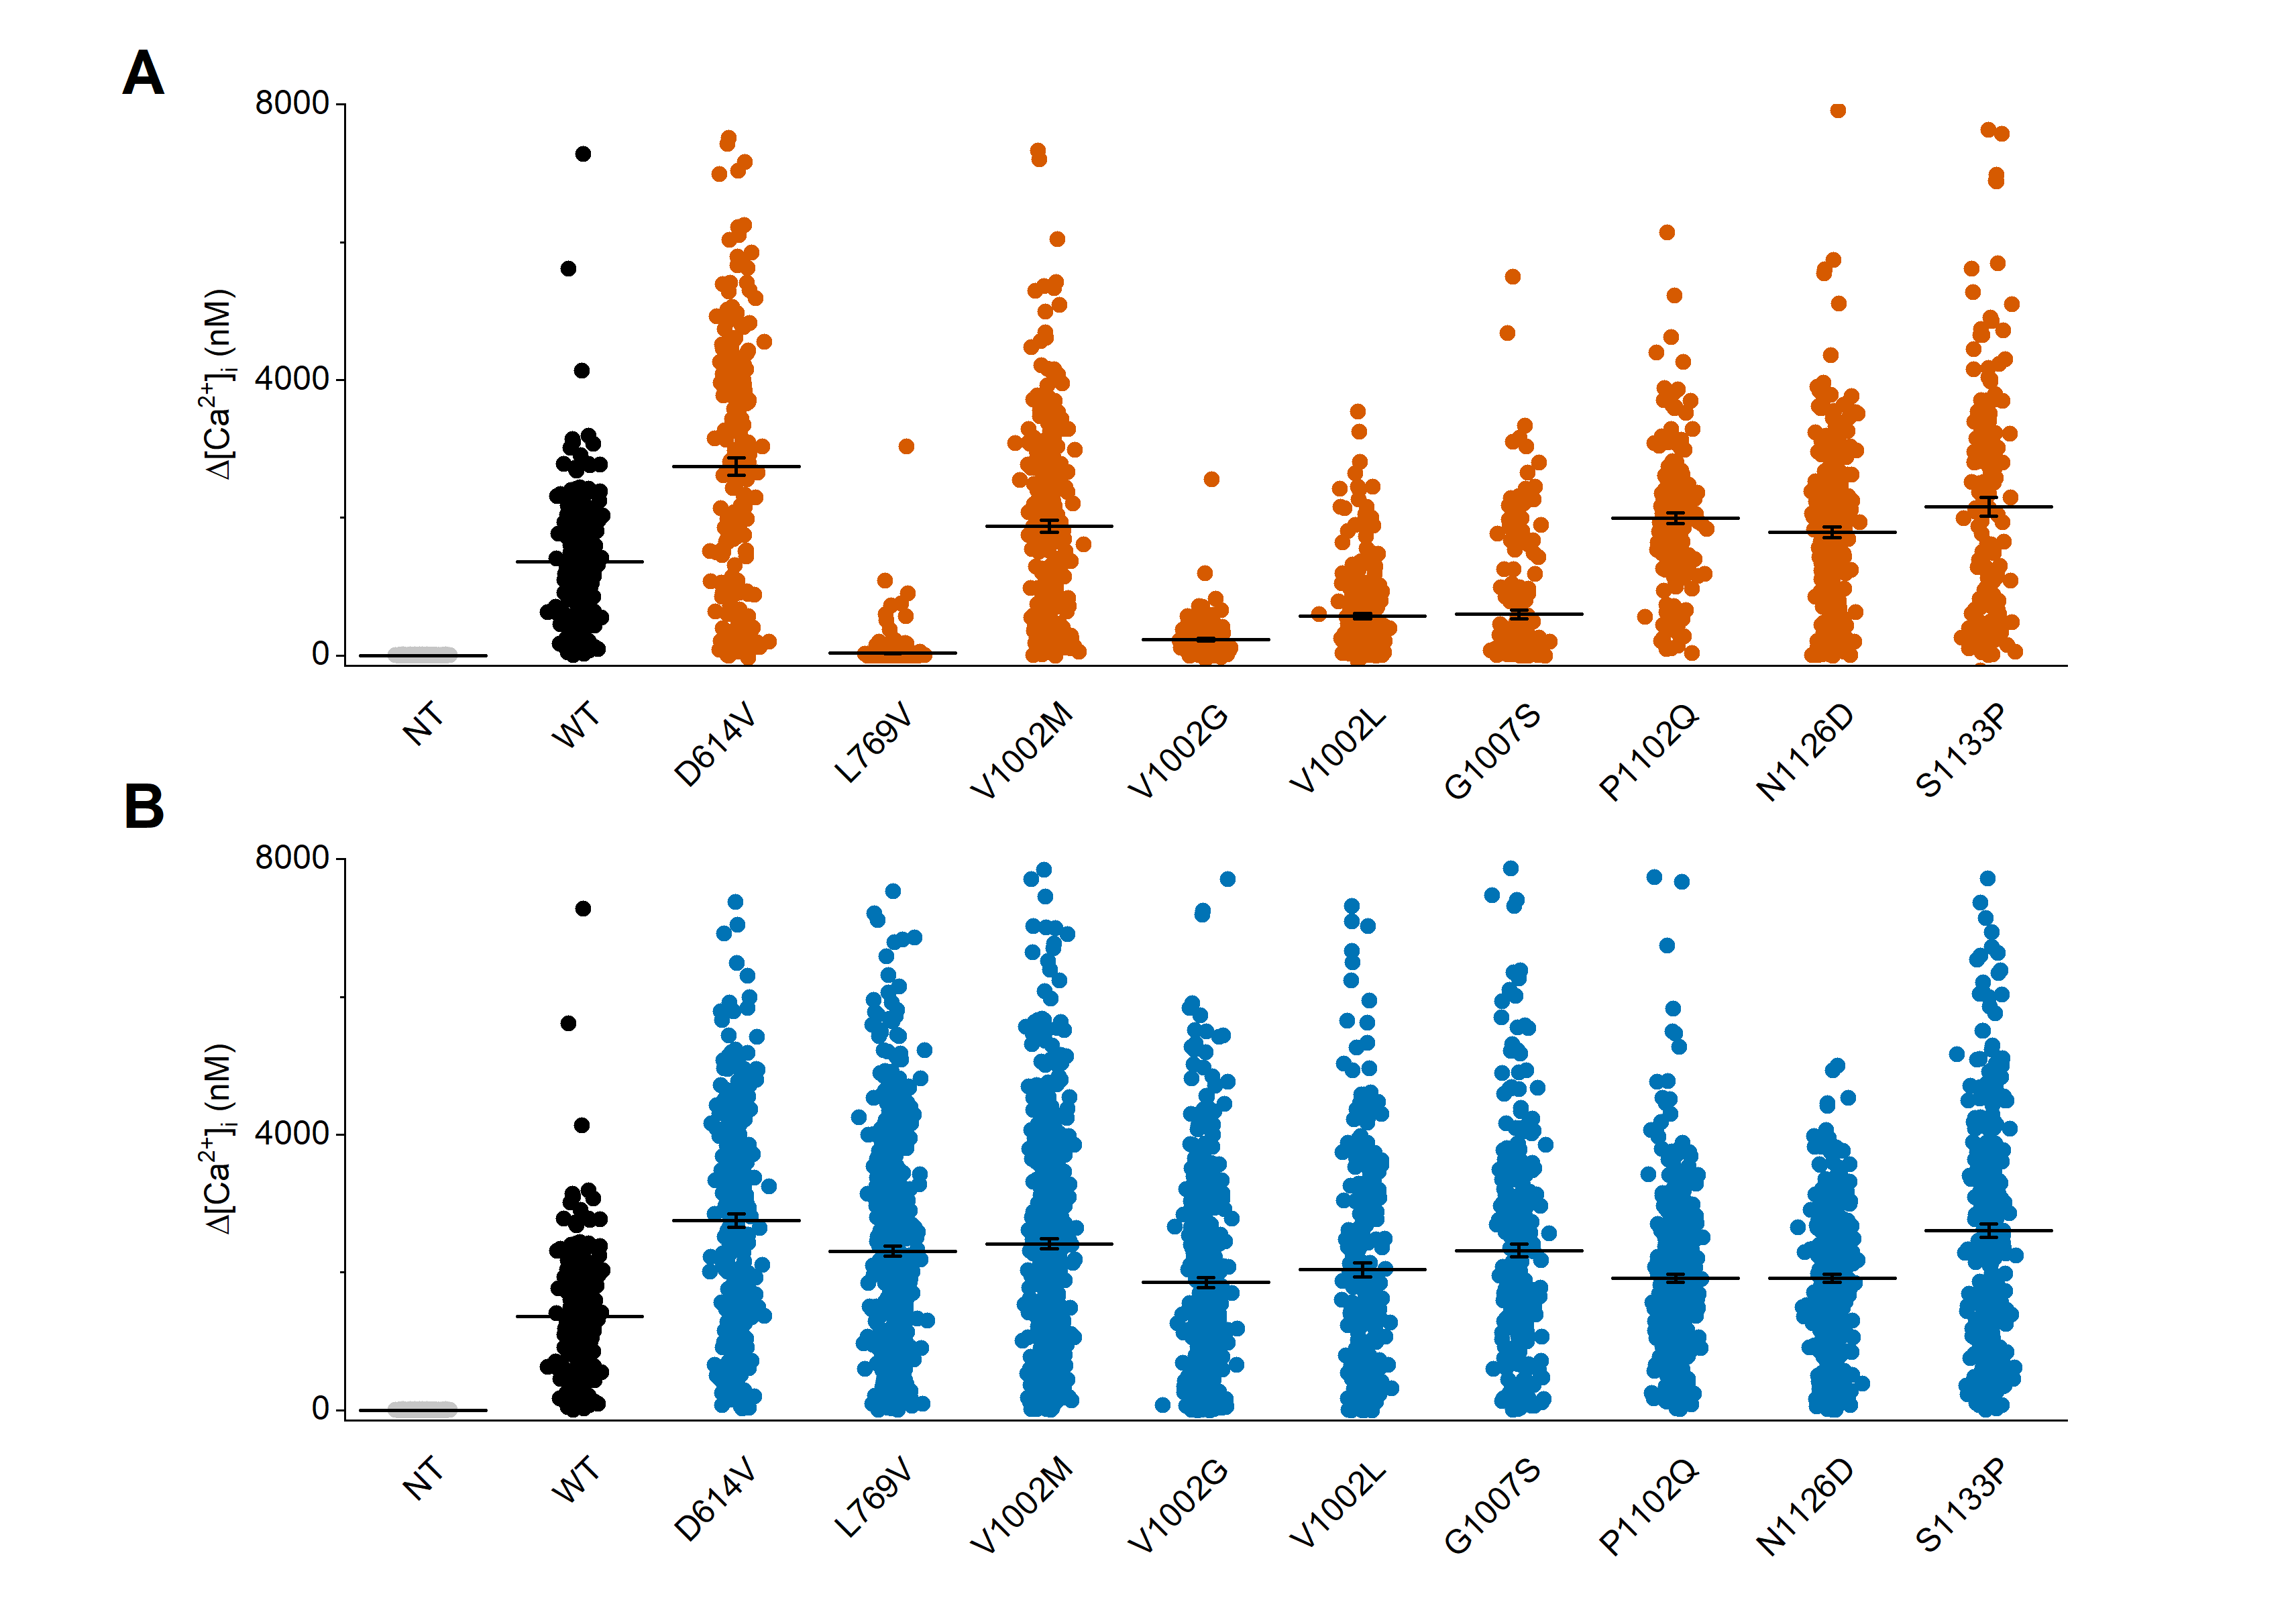

Supplement: supp [file elife_poa_e81032_Figure_4_figure_supplement_2.docx]

**FIGURE 4 – FIGURE SUPPLEMENT 3**


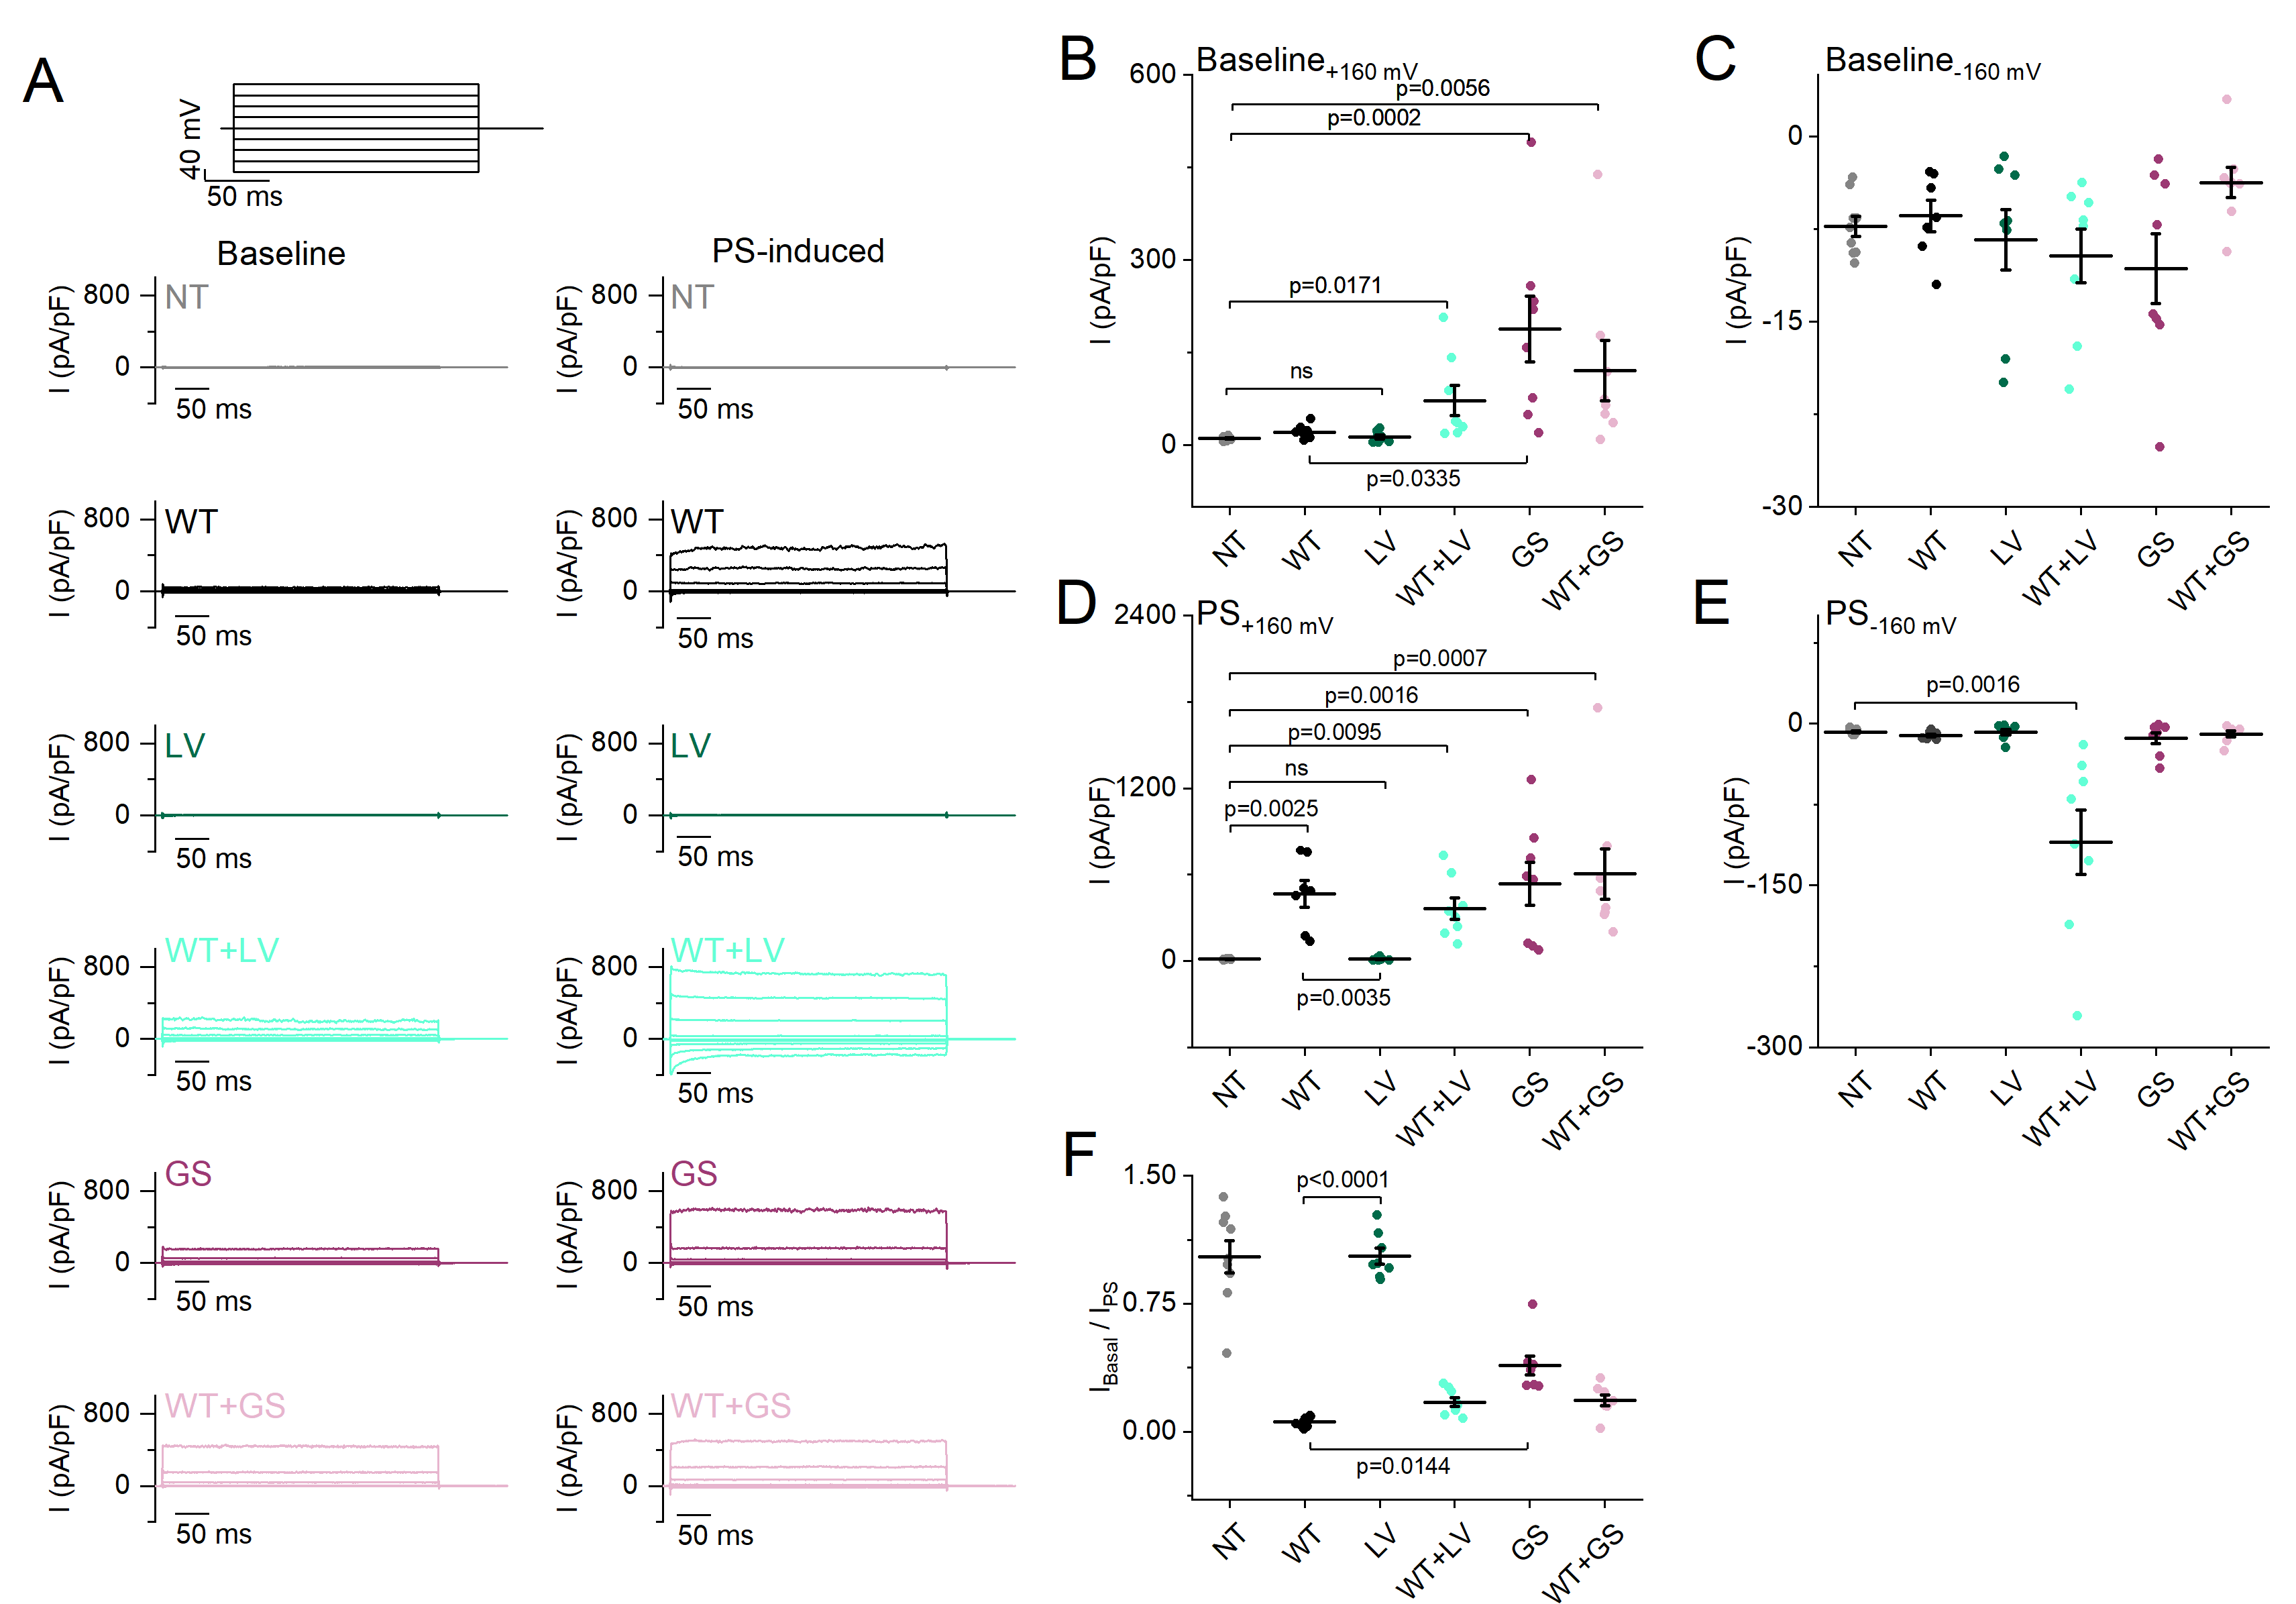

Supplement: supp [file elife_poa_e81032_Figure_4_figure_supplement_3.docx]

**FIGURE 5 – FIGURE SUPPLEMENT 1**

**
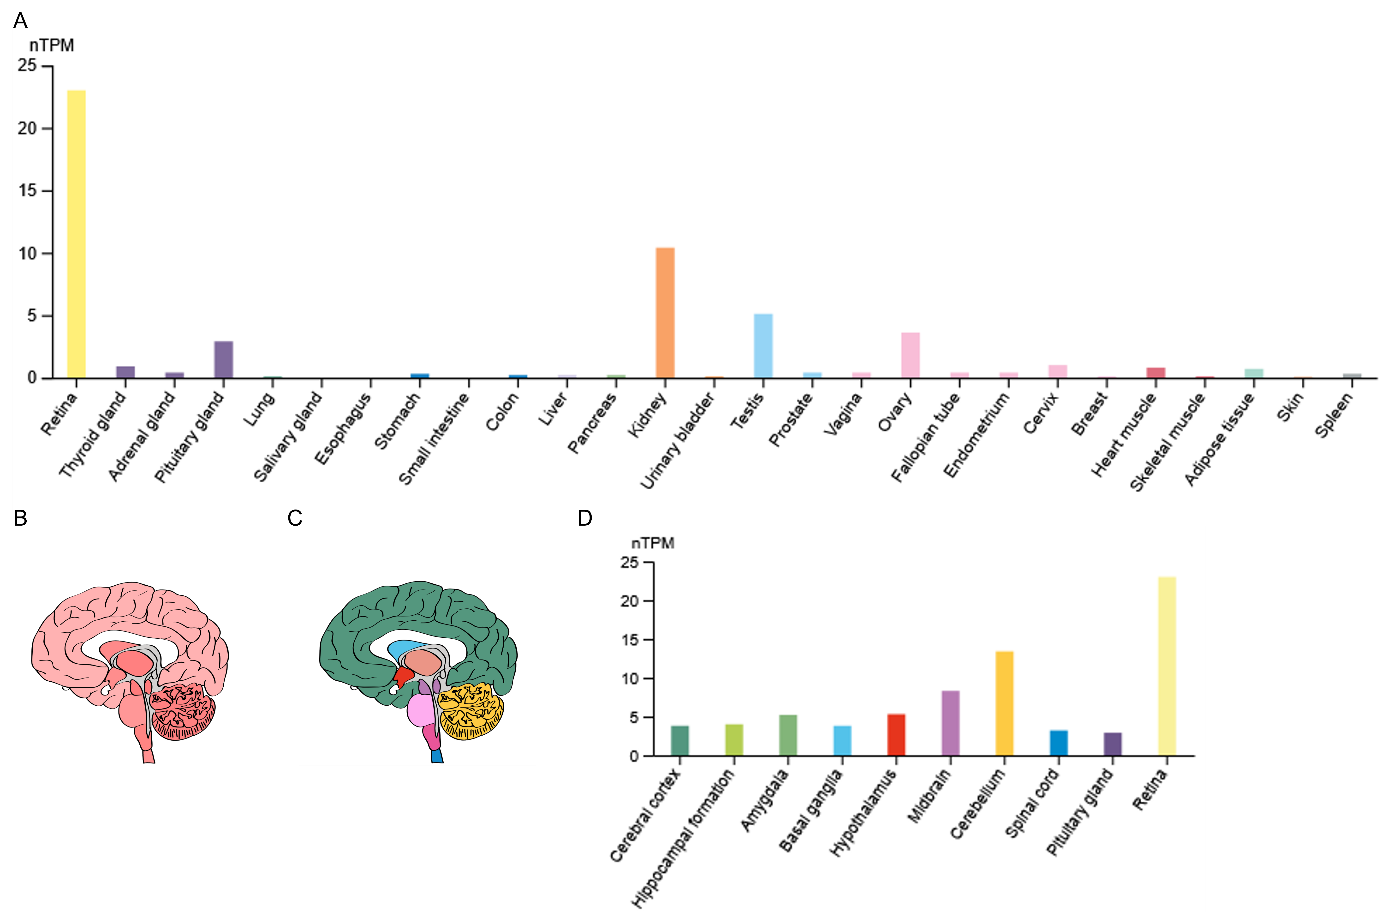
**

Supplement: supp [file elife_poa_e81032_Figure_5_figure_supplement_1.docx]

**FIGURE 5 – FIGURE SUPPLEMENT 2**

**
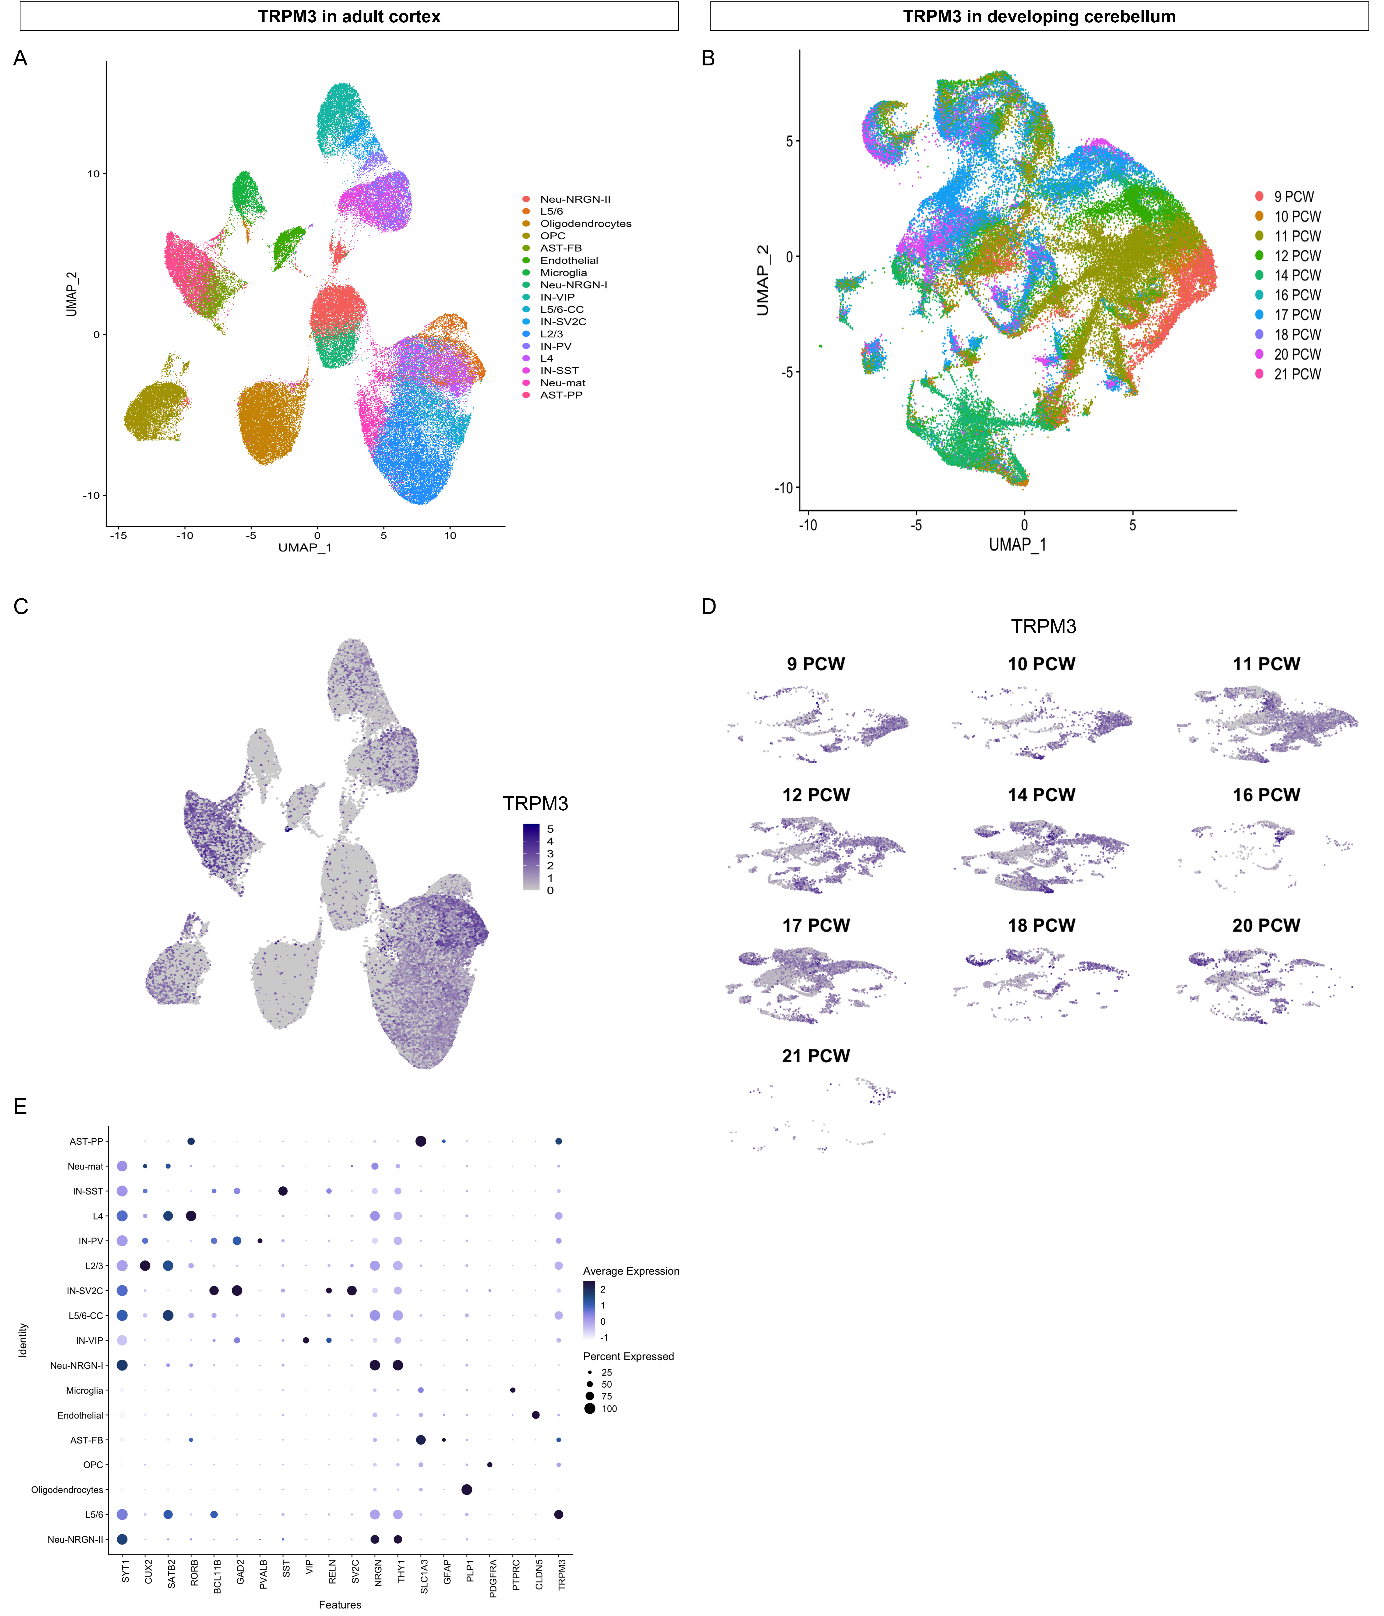
**

Supplement: supp [file elife_poa_e81032_Figure_5_figure_supplement_2.docx]
